# Supplementary material
Source: ML conference proceedings conference paper supplement (https://openaccess.thecvf.com/content/CVPR2024/html/Cho_TTA-EVF_Test-Time_Adaptation_CVPR_2024_paper.html)
Supplement: Supplementary file 1 [file Cho_TTA-EVF_Test-Time_Adaptation_CVPR_2024_supplemental.zip]

Archive with 2 entries (2 files):
- 3095_supp.mp4
- 3095_supp.pdf
